# Supplementary material
Source: MDPI journal article supplement (https://www.mdpi.com/2036-7481/12/2/35)
Supplement: s1 [file s1]

Archive with 1 entries (1 files):
- microbiolres-1180007-supplementary.pdf
