# Supplementary material
Source: MDPI journal article supplement (https://www.mdpi.com/2036-7481/12/2/35)
Supplement: s1 [file s1 › microbiolres-1180007-supplementary.pdf]

Supplementary Material

**Table S1.** Genomic features of *Methylobacter* BIB1.

| Traits                       | Values                                      |
|------------------------------|---------------------------------------------|
| Genome size                  | 4.86584 Mb                                  |
| G+C content                  | 51.3 %                                      |
| N50                          | 50,157                                      |
| Proteins (according to NCBI) | 4319                                        |
| tRNA, nc RNA                 | 38, 4                                       |
| rRNA                         | 3                                           |
| Contigs                      | 240                                         |
| Bioproject number            | PRJNA675424                                 |
| Sequencing platform used     | Illumina Hiseq, 2*150 paired-end sequencing |
| NCBI Accession number        | JADMKV01                                    |

**Table S2.** Blastp analysis of the annotated protein list of the BIB1 genome. (The table contains the name of the enzyme, protein name and amino acid length, NCBI annotated accession number, closest affiliate along with percent similarity and the affiliate accession number).

| Enzyme/ Protein                                                 | Accession number | Current closest relative with percent similarity   | Accession no. of the closest current relative |
|-----------------------------------------------------------------|------------------|----------------------------------------------------|-----------------------------------------------|
| <b>Methane metabolism</b>                                       |                  |                                                    |                                               |
| <b>Methane monooxygenase</b>                                    |                  |                                                    |                                               |
| Methane monooxygenase/ ammonia monooxygenase subunit C (250 aa) | WP_194968270.1   | <i>Methylobacter luteus</i> IMV-B-3098<br>97.60%   | WP_027159169.1                                |
| Methane monooxygenase/ ammonia monooxygenase subunit B (414 aa) | WP_194968272.1   | <i>Methylobacter luteus</i> IMV-B-3098<br>96.38%   | WP_027159171.1                                |
| Methane monooxygenase/ ammonia monooxygenase subunit A (247 aa) | WP_194968271.1   | <i>Methylobacter luteus</i> IMV-B-3098<br>98.79%   | WP_027159170.1                                |
| <b>Methanol dehydrogenase</b>                                   |                  |                                                    |                                               |
| Methanol/ethanol family PQQ-dependent dehydrogenase (617 aa)    | WP_194969372.1   | <i>Methylobacter luteus</i> IMV-B-3098<br>98.06%   | WP_027156973.1                                |
| Methanol/ethanol family PQQ-dependent dehydrogenase (587 aa)    | WP_194970903.1   | <i>Methylobacter luteus</i> IMV-B-3098<br>98.63%   | WP_027158520.1                                |
| Zinc-dependent alcohol dehydrogenase family protein (330 aa)    | WP_194969024.1   | <i>Methylobacter luteus</i> IMV-B-3098<br>90.61%   | WP_027156944.1                                |
| Zinc-dependent alcohol dehydrogenase family protein (341 aa)    | WP_194972107.1   | <i>Methylobacter luteus</i> IMV-B-3098<br>89.74%   | WP_027158154.1                                |
| NAD(P)-dependent alcohol dehydrogenase (354 aa)                 | WP_194969379.1   | <i>Methylobacter tundripaludum</i> 21/22<br>80.52% | WP_027149771.1                                |
| Methanol dehydrogenase [cytochrome c] MoxF (94 aa)              | WP_027158517.1   | <i>Methylobacter marinus</i> A45<br>94.62%         | WP_020158035.1                                |
| Methanol oxidation system protein MoxJ (295 aa)                 | WP_194970898.1   | <i>Methylobacter</i> sp. BBA5.1<br>94.24%          | WP_081917930.1                                |
| <b>Formaldehyde dehydrogenase</b>                               |                  |                                                    |                                               |
| glutathione-dependent formaldehyde dehydrogenase (390 aa)       | WP_194969551.1   | <i>Methylobacter luteus</i> IMV-B-3098<br>94.87%   | WP_027157143.1                                |

|                                                                          |                |                                                      |                |
|--------------------------------------------------------------------------|----------------|------------------------------------------------------|----------------|
| aldehyde dehydrogenase family protein (506 aa)                           | WP_194969126.1 | <i>Methylobacter luteus</i> IMV-B-3098<br>94.27%     | WP_027158760.1 |
| aldehyde dehydrogenase family protein (476 aa)                           | WP_194972017.1 | <i>Methylobacter luteus</i> IMV-B-3098<br>87.61%     | WP_036242998.1 |
| Methylenetetrahydromethanopterin dehydrogenase (302 aa)                  | WP_194969028.1 | <i>Methylobacter luteus</i> IMV-B-3098<br>97.34%     | WP_027156940.1 |
| Methylenetetrahydromethanopterin dehydrogenase (301 aa)                  | WP_194969029.1 | <i>Methylobacter luteus</i> IMV-B-3098<br>98.01%     | WP_027156939.1 |
| formylmethanofuran dehydrogenase subunit B (419 aa)                      | WP_194971419.1 | <i>Methylobacter luteus</i> IMV-B-3098<br>94.27%     | WP_027157051.1 |
| formylmethanofuran dehydrogenase subunit A (555 aa)                      | WP_194971420.1 | <i>Methylobacter marinus</i> A45<br>95.68%           | WP_020160238.1 |
| formylmethanofuran dehydrogenase subunit C (271 aa)                      | WP_194971422.1 | <i>Methylobacter luteus</i> IMV-B-3098<br>95.56%     | WP_027157054.1 |
| <b>Formate dehydrogenase</b>                                             |                |                                                      |                |
| formate dehydrogenase subunit delta (65 aa)                              | WP_194971613.1 | <i>Methylobacter luteus</i> IMV-B-3098<br>90.77%     | WP_027159490.1 |
| formate dehydrogenase accessory sulfurtransferase FdhD (282 aa)          | WP_194971614.1 | <i>Methylobacter luteus</i> IMV-B-3098<br>94.33%     | WP_027159491.1 |
| formate dehydrogenase subunit alpha (945 aa)                             | WP_194971615.1 | <i>Methylobacter luteus</i> IMV-B-3098<br>97.35%     | WP_027159492.1 |
| formate dehydrogenase (517 aa)                                           | WP_194971616.1 | <i>Methylobacter luteus</i> IMV-B-3098<br>94.78%     | WP_027159493.1 |
| formate dehydrogenase subunit gamma (158 aa)                             | WP_194971617.1 | <i>Methylobacter luteus</i> IMV-B-3098<br>94.94%     | WP_027159494.1 |
| NAD-dependent formate dehydrogenase (401 aa)                             | WP_194971647.1 | <i>Methylobacter whittenburyi</i> ACM 3310<br>97.5%  | WP_036298316.1 |
| <b>Carbon dioxide fixation</b>                                           |                |                                                      |                |
| LysR family transcriptional regulator (CbbR) of Ru-bisCO operon (301 aa) | WP_194969243.1 | <i>Methylobacter luteus</i> IMV-B-3098<br>97.34%     | WP_036243303.1 |
| <b>Nitrogen metabolism</b>                                               |                |                                                      |                |
| <b>Cyanate hydrolysis (cyanate → ammonium)</b>                           |                |                                                      |                |
| Cyanate hydratase/ cyanase CynS                                          | WP_194971646.1 | <i>Methylosarcina lacus</i> LW14<br>92.52%           | WP_024299829.1 |
| <b>Nitrogen fixation (Nitrogen → Ammonia)</b>                            |                |                                                      |                |
| nitrogenase molybdenum-iron protein alpha chain NifD (494 aa)            | WP_194972098.1 | <i>Methylobacter whittenburyi</i> ACM 3310<br>99.19% | WP_036299212.1 |
| nitrogenase molybdenum-iron protein subunit beta NifK (523 aa)           | WP_194972097.1 | <i>Methylobacter luteus</i> IMV-B-3098<br>95.98%     | WP_027158572.1 |
| nitrogenase iron protein NifH (290 aa)                                   | WP_194972099.1 | <i>Methylobacter luteus</i> IMV-B-3098<br>97.24%     | WP_027158574.1 |

|                                                                                                        |                |                                                      |                |
|--------------------------------------------------------------------------------------------------------|----------------|------------------------------------------------------|----------------|
| nitrogenase cofactor biosynthesis protein NifB (495 aa)                                                | WP_194968538.1 | <i>Methylobacter luteus</i> IMV-B-3098<br>97.38%     | WP_027159369.1 |
| nitrogenase-associated protein (145 aa)                                                                | WP_194968540.1 | <i>Methylobacter luteus</i> IMV-B-3098<br>86.3%      | WP_051299967.1 |
| nitrogenase-stabilizing/protective protein NifW (104 aa)                                               | WP_194968567.1 | <i>Methylobacter whittenburyi</i> ACM 3310<br>94.23% | WP_036299321.1 |
| nitrogenase iron-molybdenum cofactor biosynthesis protein NifE (464 aa)                                | WP_194971348.1 | <i>Methylobacter luteus</i> IMV-B-3098<br>98.49%     | WP_027159440.1 |
| nitrogenase iron-molybdenum cofactor biosynthesis protein NifN (463 aa)                                | WP_194971349.1 | <i>Methylobacter luteus</i> IMV-B-3098<br>97.19%     | WP_027159439.1 |
| nitrogen fixation negative regulator NifL (532 aa)                                                     | WP_194968536.1 | <i>Methylobacter luteus</i> IMV-B-3098<br>90.06%     | WP_027159366.1 |
| nitrogen fixation protein NifQ (191 aa)                                                                | WP_194968541.1 | <i>Methylobacter luteus</i> IMV-B-3098<br>82.72%     | WP_027159371.1 |
| nitrogen fixation protein NifZ (95 aa)                                                                 | WP_194968559.1 | <i>Methylobacter marinus</i> A45<br>80%              | WP_020159837.1 |
| nitrogen fixation protein NifZ (159 aa)                                                                | WP_194968568.1 | <i>Methylobacter luteus</i> IMV-B-3098<br>91.14%     | WP_027159398.1 |
| nitrogen fixation protein NifM (292 aa)                                                                | WP_194968569.1 | <i>Methylobacter luteus</i> IMV-B-3098<br>88.32%     | WP_036243252.1 |
| putative nitrogen fixation protein NifT (72 aa)                                                        | WP_194971325.1 | <i>Methylobacter luteus</i> IMV-B-3098<br>97.22%     | WP_027158571.1 |
| nitrogen fixation protein NifX (161 aa)                                                                | WP_194971350.1 | <i>Methylobacter luteus</i> IMV-B-3098<br>96.5%      | WP_081679246.1 |
| NifX-associated nitrogen fixation protein (157 aa)                                                     | WP_194971351.1 | <i>Methylobacter marinus</i> A45<br>93.63%           | WP_020159891.1 |
| <b>Nitrite reductase</b>                                                                               |                |                                                      |                |
| nitrite reductase small subunit NirD (111 aa)                                                          | WP_194970424.1 | <i>Methylobacter luteus</i> IMV-B-3098<br>83.78%     | WP_027159987.1 |
| nitrite reductase large subunit NirB (846 aa)                                                          | WP_194970425.1 | <i>Methylobacter luteus</i> IMV-B-3098<br>94.33%     | WP_027159986.1 |
| nitrite/sulfite reductase (550 aa)                                                                     | WP_194968231.1 | <i>Methylobacter luteus</i> IMV-B-3098<br>95.45%     | WP_027159113.1 |
| <b>Denitrification</b>                                                                                 |                |                                                      |                |
| nitric oxide reductase subunit B NorB / cbb3-type cytochrome c oxidase subunit I                       | WP_194970783.1 | <i>Methylobacter luteus</i> IMV-B-3098<br>95.56%     | WP_155920718.1 |
| nitric oxide reductase NorC subunit/ c-type cytochrome                                                 | WP_194970782.1 | <i>Methylobacter luteus</i> IMV-B-3098<br>94.95%     | WP_027157716.1 |
| <b>Nitrosative stress</b>                                                                              |                |                                                      |                |
| Quinol-dependent nitric oxide reductase subunit B (qNorB)/<br>cbb3-type cytochrome c oxidase subunit I | WP_194968830.1 | <i>Rugosibacter</i> sp. 72.85%                       | TAJ22755.1     |

|                                                                          |                |                                                  |                |
|--------------------------------------------------------------------------|----------------|--------------------------------------------------|----------------|
| Anaerobic nitric oxide reductase transcriptional regulator NorR (511 aa) | WP_194971240.1 | <i>Methylobacter luteus</i> IMV-B-3098<br>89.04% | WP_027158752.1 |
| Anaerobic nitric oxide reductase transcriptional regulator NorR (514 aa) | WP_194971405.1 | <i>Methylobacter luteus</i> IMV-B-3098<br>90.47% | WP_081679063.1 |
| <b>Hemerythrin metabolic protein</b>                                     |                |                                                  |                |
| Bacteriohemerythrin (338 aa)                                             | WP_194968436.1 | <i>Methylobacter luteus</i> IMV-B-3098<br>68.28% | WP_027157247.1 |
| hemerythrin family protein (132 aa)                                      | WP_194968504.1 | <i>Methylobacter luteus</i> IMV-B-3098<br>92.42% | WP_027159334.1 |
| hemerythrin domain-containing protein (131 aa)                           | WP_194971595.1 | <i>Methylobacter luteus</i> IMV-B-3098<br>82.52% | WP_027160007.1 |
| hemerythrin domain-containing protein (182 aa)                           | WP_194970353.1 | <i>Methylobacter luteus</i> IMV-B-3098<br>81.62% | WP_027157941.1 |

### Whole genome sequencing details and data analysis

DNA of strain BIB1 was extracted using the GenElute™ Bacterial Genomic DNA isolation Kit (Sigma-Aldrich, India) using the protocol for Gram negative cells. The DNA quality was checked using Nanodrop machine and by loading on the gel. Additionally, the 16S rRNA gene using this DNA was amplified and sequenced. The pure 16S rRNA gene sequence of BIB1 was obtained which indicated that there was no contamination of any other bacteria. Then, the DNA was sent to Medgenome Labs, Bangalore, India for whole genome sequencing. The whole-genome sequencing was done using the Illumina HiSeqX platform (150\*2) at Medgenome laboratory, Bangalore, India as per standard protocols. The library preparation was done according to the standard protocols developed for the platform.

Quality check on the raw fastq files was done using the FASTQC toolkit to check for base quality, base composition and GC content. Low-quality sequence reads are excluded from the analysis. The Paired-end reads were quality filtered using cutadapt [1.18]. The NEB adapters were filtered using cutadapt. After adapter trimming, human, fungi and other contamination reads are filtered. The *De novo* assembly was performed with hash length of 53 using SPADIS *De novo* assembler. The assembly was optimized using SSPACE-basic assembler to obtain high quality genome assembly.

The Kmer frequencies were calculated using in-house scripts to identify the most frequent Kmer in the data. The SPADIS default parameters (--12 for interleaved paired-end reads). Read participation in the assembly was assessed by mapping filtered paired-end reads on the assembled scaffolds.

The assembled contigs were submitted to NCBI prokaryotic genome annotation pipeline PGAP ([https://www.ncbi.nlm.nih.gov/genome/annotation\\_prok/](https://www.ncbi.nlm.nih.gov/genome/annotation_prok/)) and also uploaded in RAST (<http://rast.nmpdr.org/>) for genome annotation. To construct the metabolic pathways, the amino-acid file of the BIB1 genome was uploaded in KEGG (<https://www.kegg.jp/blastkoala/>).
